# Supplementary material for: How to Use Chromatography as a Science Teaching Aid.
Source: Royal Society of Chemistry journal article supplement (doi:10.1039/c9cp03608c), 1969-01-01
Supplement: c9cp03608c1.pdf [file c9cp03608c1.pdf]

## **Water binding to Fe<sup>III</sup> Hemes studied in cooled ion traps, characterization of a strong ‘weak ‘ligand**

Mohammad Aarabi<sup>a</sup>, Satchin Soorkia<sup>b</sup>, Gilles Grégoire<sup>b</sup>, Michel Broquier<sup>b,c</sup>, Aurélien de la  
Lande<sup>d</sup>, Benoît Soep<sup>e</sup>, Reza Omidyan<sup>a</sup> and Niloufar Shafizadeh<sup>b,\*</sup>

<sup>a</sup> *Department of Chemistry, University of Isfahan, 81746-73441 Isfahan, Iran*

<sup>b</sup> *ISMO, Université Paris-Sud, CNRS UMR 8214, bat 520, Université Paris-Sud 91405, Orsay Cedex, France*

<sup>c</sup> *Centre Laser de l'Université Paris-Sud (CLUPS/LUMAT), Univ. Paris-Sud, CNRS, IOGS, Université Paris-Saclay, F-91405 Orsay (France)*

<sup>d</sup> *Laboratoire de Chimie-Physique, Université Paris Sud, CNRS, UMR 8000. 15, rue Jean Perrin, 91405 Orsay Cedex, France.*

<sup>e</sup> *LIDYL, CEA, CNRS, Université Paris-Saclay, UMR 9222 CEA Saclay, F-91191 Gif-sur-Yvette,*

*\*[niloufar.shafizadeh@u-psud.fr](mailto:niloufar.shafizadeh@u-psud.fr)*

## Contents

|                                                                                                                                                                                                                                                                                                                                             |    |
|---------------------------------------------------------------------------------------------------------------------------------------------------------------------------------------------------------------------------------------------------------------------------------------------------------------------------------------------|----|
| 1) The spin projection method applied to correct the spin contaminated energies: .....                                                                                                                                                                                                                                                      | 4  |
| 2) ELF (Electron Localisation Function) and AIM (Atoms in Molecules) analysis: .....                                                                                                                                                                                                                                                        | 4  |
| <b>Figure S0:</b> Evolution of the formation of $[\text{MI-PP-Fe}^{\text{III}}-(\text{H}_2\text{O})]^+$ as a function of temperature. * is an impurity and does not change in intensity with temperature. ....                                                                                                                              | 6  |
| Figure S1 : complexation of free ferric heme and protonated heme at two temperatures 189 and 160 K . Black experimental spectrum , Red fitting curve blue ferric heme in 1/1 complexation at 190 and 4/1 at 160K. Green protonated heme 1/70 at 189 K to 1/45 at 160 K .....                                                                | 6  |
| Figure S2: The optimized $[\text{heme-Fe}^{\text{III}}-(\text{H}_2\text{O})_2]^+$ accompanied with a counter ion. ....                                                                                                                                                                                                                      | 7  |
| <b>Figure S3 A:</b> Simulated spectra of $[\text{PP Fe}^{\text{III}}]^+$ (red) and $[\text{PP Fe}^{\text{III}}-\text{H}_2\text{O}]^+$ (black), $[\text{PP Fe}^{\text{III}}-\text{N}_2]^+$ (green) complexes ( $S=3/2$ ), sticks and convolution with a Gaussian of 40 nm width FWHM. Within the arrow , evolving charge transfer bands..... | 7  |
| .....                                                                                                                                                                                                                                                                                                                                       | 8  |
| <b>Figure S3 B:</b> Experimental spectrum of $[\text{PP Fe}^{\text{III}} \text{N}_2]^+$ (black) and calculated $[\text{PP Fe}^{\text{III}}-\text{N}_2]^+$ complex ( $S=3/2$ ) (Blue Sticks) .....                                                                                                                                           | 8  |
| <b>Figure S4:</b> Topological Electron Localized Function (ELF) determined by the TopMode algorithm based on the OPBX-PBE optimized geometry of the $[\text{PP Fe}^{\text{III}}-\text{H}_2\text{O}]^+$ complex. ....                                                                                                                        | 8  |
| <b>Table S1:</b> Relative spin state energies of the ferric Heme complex with/without $\text{H}_2\text{O}$ ligand (in $\text{kcalmol}^{-1}$ ) determined at the OPTX-PBE level.....                                                                                                                                                         | 9  |
| <b>Table S2:</b> The optimized $[\text{heme-Fe}^{\text{III}}]^+$ systems: .....                                                                                                                                                                                                                                                             | 10 |
| <b>Table S3A:</b> Electronic transition energies and the contributed MOs in transitions, obtained at the B3LYP/cc-pVDZ (TZVP for Fe) level of theory for the $[\text{Fe}^{\text{III}} \text{PP-H}_2\text{O}]^+$ complex ( $S=3/2$ ) using the geometry optimized at OPTX-PBE level. H and L stand for HOMO and LUMO respectively.....       | 11 |
| <b>Table S3B:</b> Electronic transition energies and the contributed MOs in transitions, obtained at the B3LYP/cc-pVDZ (TZVP for Fe) level of theory for $[\text{Fe}^{\text{III}} \text{PP}]^+$ complex ( $S=3/2$ ) using the                                                                                                               |    |

|                                                                                                                                                                                                                                                            |    |
|------------------------------------------------------------------------------------------------------------------------------------------------------------------------------------------------------------------------------------------------------------|----|
| geometry optimized at OPTX-PBE level. H and L stand for HOMO and LUMO respectively<br>.....                                                                                                                                                                | 13 |
| <b>Table S4:</b> Single point calculation with two different functionals and cc-pVTZ (C, H, O)//aug-ccpVTZ (Fe, N, O (H <sub>2</sub> O)) basis sets, both on the previously OPBE optimized [heme Fe <sup>III</sup> -H <sub>2</sub> O] complex (S=3/2)..... | 15 |
| <b>Table S5</b> Dipole(H <sub>2</sub> O)–Charge(Fe) interaction energy. Dipoles and charges obtained from OPBE calculations.....                                                                                                                           | 15 |
| <b>Table S6:</b> The xyz coordinates of the spin state optimized geometry of the ferric Heme complexes investigated in this study at the OPTX-PBE level of theory.....                                                                                     | 16 |

1) The spin projection method applied to correct the spin contaminated energies:

In this method the spin projected energy  $E_S$  is calculated by subtracting the energy contribution of the higher spin state  $E_{S+1}$  from the spin contaminated energy  $E_C$  with subsequent renormalization using the following equations:

$$E_S = \frac{E_C - aE_{S+1}}{1 - a}$$

$$a = \frac{\langle S^2 \rangle_C - S(S+1)}{2(S+1)}$$

Where  $\langle S^2 \rangle_C$  is the expectation value of  $S^2$  obtained from the spin contaminated wave function and  $S$  is the total spin.

2) ELF (Electron Localisation Function) and AIM (Atoms in Molecules) analysis:

To analyze the electron distribution resulting from the ligation with  $H_2O$ , the ELF and AIMS functions were used. The ELF function (denoted as  $\eta$ ) can be interpreted as a measure of the Pauli repulsion in the atomic or molecular space. At a given point in space, the function reflects the probability of finding a localized electron or a localized pair of electrons, therefore providing meanings to electron localization. Topologically, the ELF isosurfaces partition the molecular space into chemically intuitive regions such as bonds, lone pairs, etc. In fact, the topological analysis of ELF function allows one to distinguish between core basins and valence basins. The core basins denoted as  $C(X)$  with  $X$  being a nucleus. The valence basins split into bonding basins connected to more than one atomic center, denoted as  $V(X, Y, \dots)$ , with  $X, Y, \dots$  being nuclei) and non-bonding basins (lone pairs) connected to only one atomic center (labelled  $V(X)$ ). Accordingly, the existence of a bonding valence basin in the region between two interacting atoms exhibits sharing of electrons and covalence bond.

In QTAIM (Quantum Theory of Atoms in Molecules), Bader's theory allows one to study the concept of chemical bond by exploiting the topological features of the electron density at a Bond Critical Point (BCP) of two interacting atoms and thereby offering a definition of chemical bonding and its strength. Chemical bonding interactions could be characterized according to the topological

properties of electron density at BCP ( $\rho_{\text{BCP}}$ ) namely, its Laplacian ( $\nabla^2\rho_{\text{BCP}}$ ), the electronic kinetic energy density ( $G_{\text{BCP}}$ ), the electronic potential energy density ( $V_{\text{BCP}}$ ) and the total electronic energy densities ( $H_{\text{BCP}}$ ). The electron density and its Laplacian stand for the power of the interaction, hence, the stronger interactions exhibit greater  $\rho_{\text{BCP}}$  and  $\nabla^2\rho_{\text{BCP}}$  values. The Laplacian of electron density indicates the charge concentration and depletion of electron distribution, so that  $\nabla^2\rho_{\text{BCP}} < 0$  and  $\nabla^2\rho_{\text{BCP}} > 0$  belong to a covalent and closed-shell type bonding, respectively. This is despite of strongly polar interactions in where Laplacian can have both signs.

Basically, the definition of a covalent bond was suggested based on two conditions<sup>1-3</sup> :

a) The existence of a BCP in the inter-nuclear region (necessary condition) and b)  $H_{\text{BCP}} < 0$  (sufficient condition). Analogously, the term partially covalent has been recently given for systems verifying  $|V_{\text{BCP}}| < 2G_{\text{BCP}}$  and  $|V_{\text{BCP}}| > G_{\text{BCP}}$ . Based on this fact there are three possibilities: I)  $|V_{\text{BCP}}|/G_{\text{BCP}} < 1$  and ( $H_{\text{BCP}} > 0$ ), II)  $1 < |V_{\text{BCP}}|/G_{\text{BCP}} < 2$  ( $-G_{\text{BCP}} < H_{\text{BCP}} < 0$ ), and III)  $|V_{\text{BCP}}|/G_{\text{BCP}} > 2$  and ( $H_{\text{BCP}} < -G_{\text{BCP}}$ ). The I and II associate with the pure ionic character and ionic-covalent (or partially covalent) character and III indicates to the classical covalent nature of the interaction, respectively<sup>1-3</sup>.

The values of  $\rho_{\text{BCP}}$  and  $\nabla^2\rho_{\text{BCP}}$  at BCP of Fe–O bond are calculated to be 0.043 and 0.145 which are both relatively substantial and lie in the range of strong interactions. Interestingly, the calculated value of  $V_{\text{BCP}}$  dominates the  $G_{\text{BCP}}$  value, and results in the overall negative value of the total energy density, ( $H_{\text{BCP}} = -0.010$  a.u.). Importantly, the ratio of  $|V_{\text{BCP}}|/G_{\text{BCP}}$  is 1.217 falling in  $1 < |V_{\text{BCP}}|/G_{\text{BCP}} < 2$  range (class II). Based on the standard definition for the  $1 < |V_{\text{BCP}}|/G_{\text{BCP}} < 2$ , and considering other QTAIM parameters, it can be realized that topological properties at BCPs predicts a mixed, ionic/covalent component character for Fe<sup>III</sup>–H<sub>2</sub>O interaction, confirming the results derived from ELF analysis.

## References:

1. S. J. Grabowski, *Chem. Rev.*, 2011, **111**, 2597.
2. E. Espinosa, I. Alkorta, J. Elguero and E. Molins, *J. Chem. Phys.*, 2002, **117**, 5529.
3. I. Cukrowski, J. H. de Lange and M. Mitoraj, *J. Phys. Chem. A*, 2014, **118**, 623.

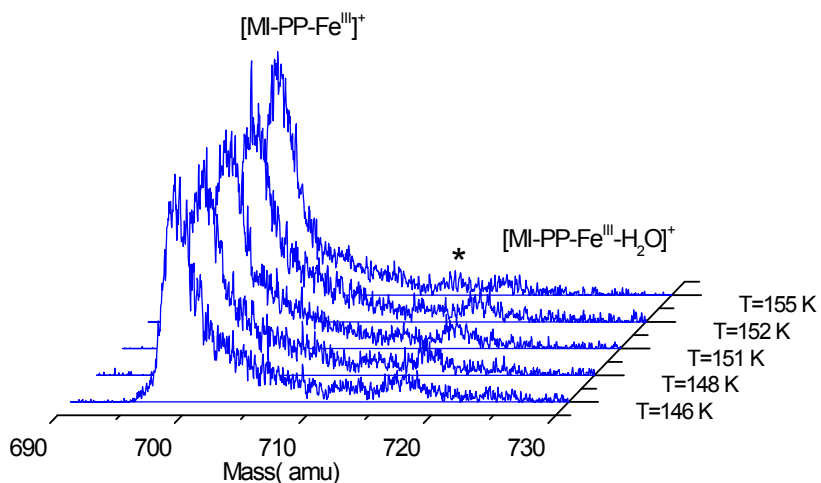

**Figure S0:** Evolution of the formation of  $[MI-PP-Fe^{III}-(H_2O)]^+$  as a function of temperature. \* is an impurity and does not change in intensity with temperature.

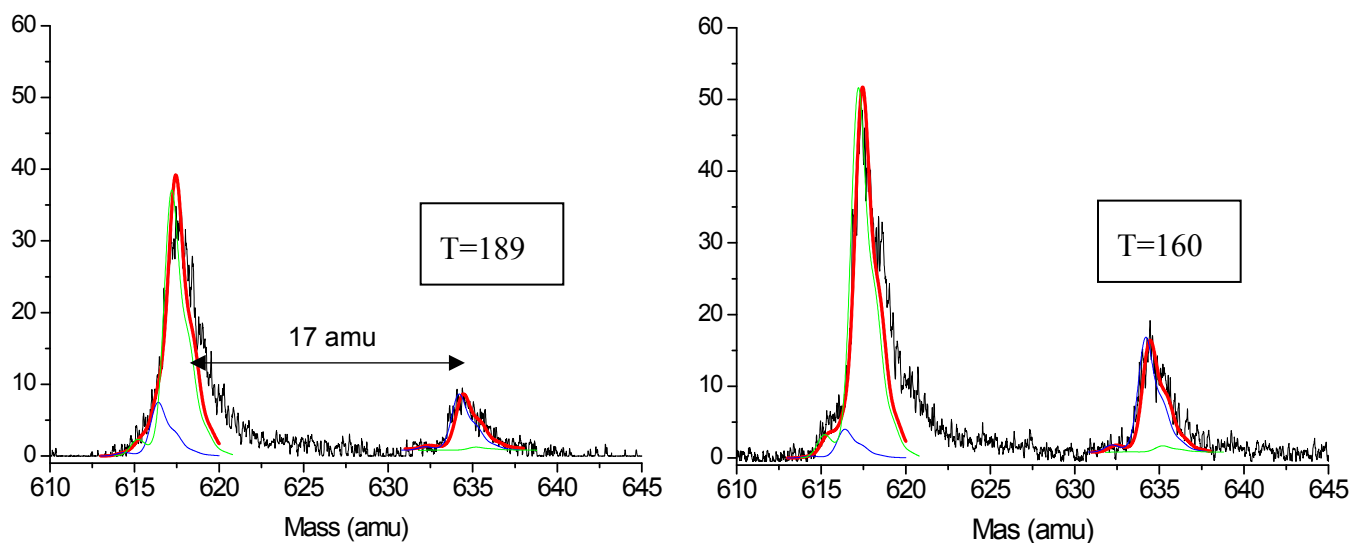

**Figure S1 :** complexation of free ferric heme and protonated heme at two temperatures 189 and 160 K . Black experimental spectrum , Red fitting curve blue ferric heme in 1/1 complexation at 190 and 4/1 at 160K. Green protonated heme 1/70 at 189 K to 1/45 at 160K

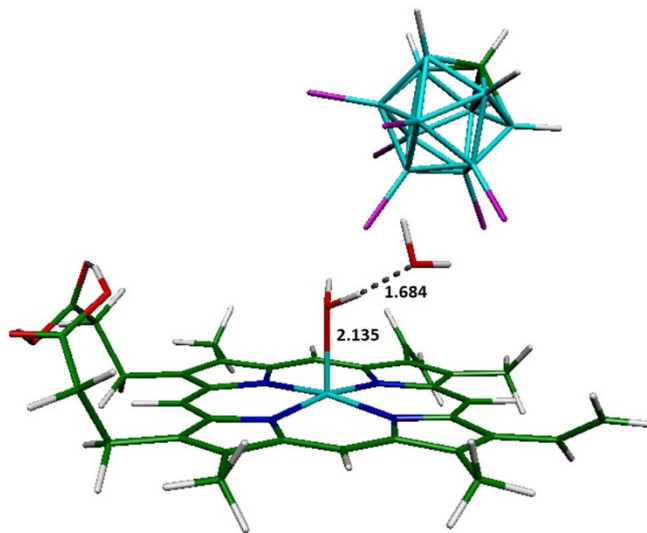

Figure S2: The optimized [heme-Fe<sup>III</sup>-(H<sub>2</sub>O)<sub>2</sub>]<sup>+</sup> accompanied with a counter ion.

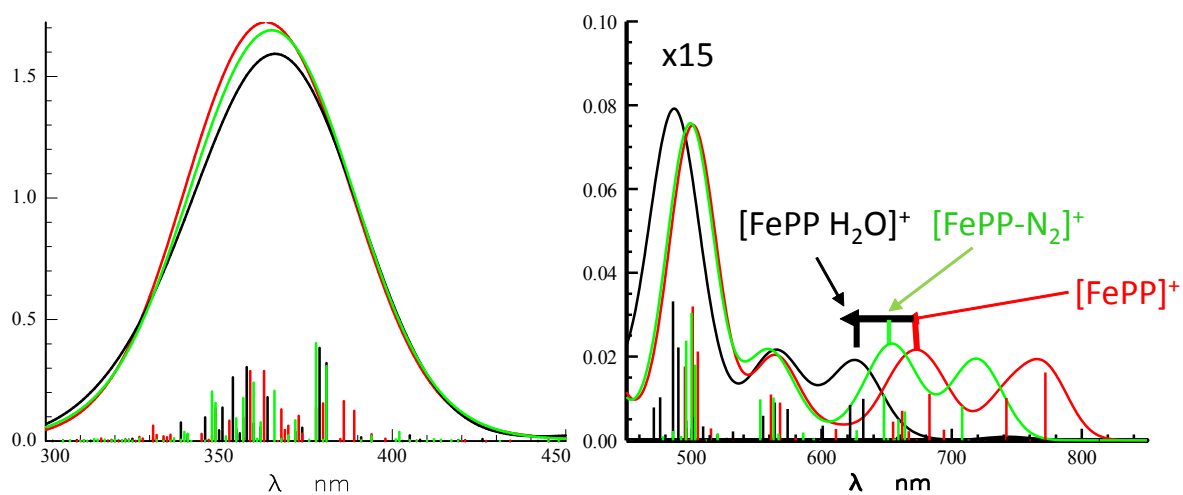

Figure S3 A: Simulated spectra of [PP Fe<sup>III</sup>]<sup>+</sup> (red) and [PP Fe<sup>III</sup>-H<sub>2</sub>O]<sup>+</sup> (black), [PP Fe<sup>III</sup>-N<sub>2</sub>]<sup>+</sup> (green) complexes (*S*=3/2), sticks and convolution with a Gaussian of 40 nm width FWHM. Within the arrow, evolving charge transfer bands.

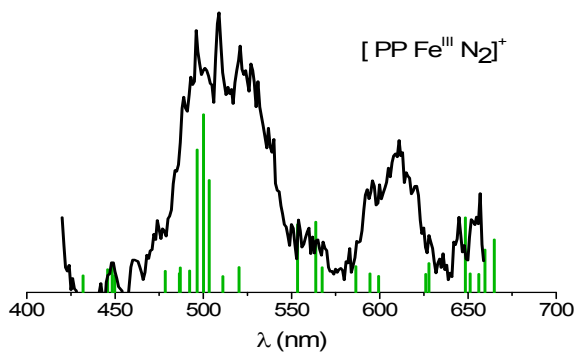

**Figure S3 B:** Experimental spectrum of  $[\text{PP Fe}^{\text{III}} \text{N}_2]^+$  (black) and calculated  $[\text{PP Fe}^{\text{III}}-\text{N}_2]^+$  complex ( $S=3/2$ ) (green Sticks) .

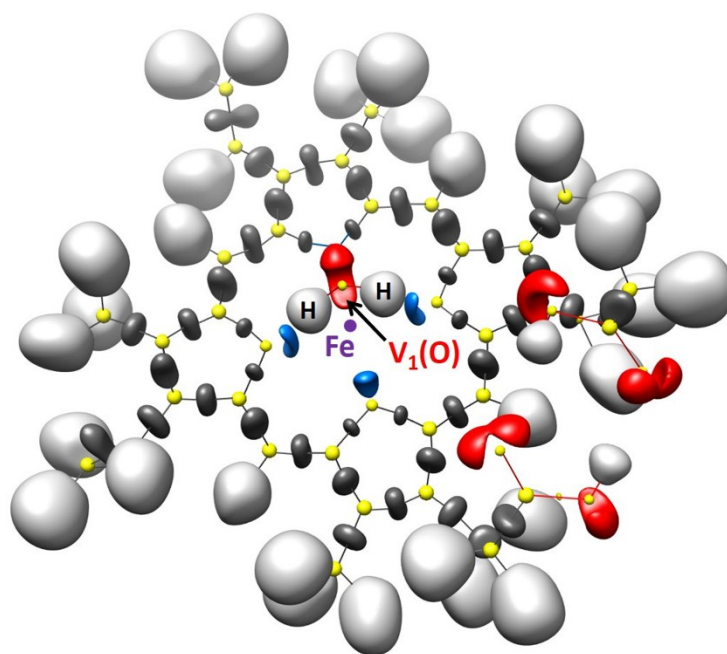

**Figure S4:** Topological Electron Localized Function (ELF) determined by the TopMode algorithm based on the OPBX-PBE optimized geometry of the  $[\text{PP Fe}^{\text{III}}-\text{H}_2\text{O}]^+$  complex.



**Table S1:** Relative spin state energies of the ferric Heme complex with/without H<sub>2</sub>O ligand (in kcalmol<sup>-1</sup>) determined at the OPTX-PBE level.

| Spin state | [PP-Fe <sup>III</sup> ] <sup>+</sup> | [PP-Fe <sup>III</sup> -H <sub>2</sub> O] <sup>+</sup> |
|------------|--------------------------------------|-------------------------------------------------------|
| 1/2        | 18.58                                | 25.44                                                 |
| <b>3/2</b> | <b>0.00</b>                          | <b>0.00</b>                                           |
| 5/2        | 11.93                                | 7.55                                                  |

**Table S2:** The optimized [heme-Fe<sup>III</sup>]<sup>+</sup> systems:

| Spin | [heme-Fe <sup>III</sup> -H <sub>2</sub> O] <sup>+</sup> | [heme-Fe <sup>III</sup> ] <sup>+</sup> |
|------|---------------------------------------------------------|----------------------------------------|
| 1/2  |                                                         |                                        |
| 3/2  |                                                         |                                        |
| 5/2  |                                                         |                                        |

| [MI-heme-Fe <sup>III</sup> -(H <sub>2</sub> O)] <sup>+</sup> | [MI-heme-Fe <sup>III</sup> ] <sup>+</sup> |
|--------------------------------------------------------------|-------------------------------------------|
|                                                              |                                           |

**Table S3A:** Electronic transition energies and the contributed MOs in transitions, obtained at the B3LYP/cc-pVDZ (TZVP for Fe) level of theory for the  $[\text{Fe}^{\text{III}} \text{PP-H}_2\text{O}]^+$  complex ( $S=3/2$ ) using the geometry optimized at OPTX-PBE level. H and L stand for HOMO and LUMO respectively

| Vertical |       |                      | Contributed orbitals                                                                            | Weight (%) | Shape                                                                                |                                                                                       |
|----------|-------|----------------------|-------------------------------------------------------------------------------------------------|------------|--------------------------------------------------------------------------------------|---------------------------------------------------------------------------------------|
| nm       | eV    | Oscillator strengths |                                                                                                 |            | Initial orb.<br>Cutoff=0.03                                                          | Final orb.<br>Cutoff=0.03                                                             |
| 486.650  | 2.548 | 0.033                | H-1 (b) $\rightarrow$ L+3 (b)<br>$\text{dz}^2$ (2%) $\rightarrow$ $\text{d}_\pi$ (15%)          | 28.2%      | 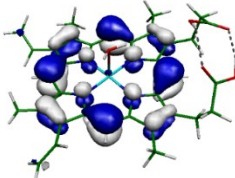   |    |
| 490.050  | 2.530 | 0.022                | H-3 (b) $\rightarrow$ L+2 (b)<br>$\text{d}_\pi$ (5%) $\rightarrow$ $\text{dz}^2$ (81%)          | 24.6%      |   |   |
|          |       |                      | H-3 (a) $\rightarrow$ L (a)<br>$\text{d}_\pi$ (3%) $\rightarrow$ $\text{dx}^2\text{-y}^2$ (40%) | 15.6%      |  |  |
|          |       |                      | H-1 (b) $\rightarrow$ L+4 (b)<br>$\text{dz}^2$ (2%) $\rightarrow$ $\text{d}_\pi$ (15%)          | 13.1%      |  |  |

|         |       |       |                                                      |       |                                                                                      |                                                                                       |
|---------|-------|-------|------------------------------------------------------|-------|--------------------------------------------------------------------------------------|---------------------------------------------------------------------------------------|
| 564.102 | 2.198 | 0.009 | H-4 (b) → L (b)<br>$d_{\pi}$ (4%) → $d_{yz}$ (56%)   | 22.5% | 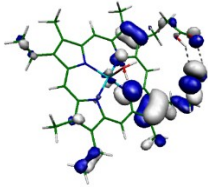   |    |
| 574.429 | 2.158 | 0.008 | H-1 (a) → L+1 (a)<br>$dz^2$ (1%) → d (0%)            | 17.1% |    |    |
|         |       |       | H-1 (b) → L+3 (b)<br>$dz^2$ (2%) → $d_{\pi}$ (15%)   | 11.9% |    |    |
|         |       |       | H (a) → L+2 (a)<br>d (0%) → d (0%)                   | 11.1% |   |   |
|         |       |       | H (b) → L+4 (b)<br>d (0%) → $d_{\pi}$ (15%)          | 10.3% |  |  |
| 622.168 | 1.993 | 0.008 | H-2 (b) → L+1 (b)<br>$d_{\pi}$ (1%) → $d_{xz}$ (56%) | 61.6% |  |  |
| 632.983 | 1.959 | 0.010 | H-2 (b) → L (b)<br>$d_{\pi}$ (1%) → $d_{yz}$ (56%)   | 43.8% |  |  |

**Table S3B:** Electronic transition energies and the contributed MOs in transitions, obtained at the B3LYP/cc-pVDZ (TZVP for Fe) level of theory for [Fe<sup>III</sup> PP]<sup>+</sup> complex (S=3/2) using the geometry optimized at OPTX-PBE level. H and L stand for HOMO and LUMO respectively

| Vertical    |           |                      | Contributed orbitals                                                | Weight (%) | Shape                                                                                |                                                                                       |
|-------------|-----------|----------------------|---------------------------------------------------------------------|------------|--------------------------------------------------------------------------------------|---------------------------------------------------------------------------------------|
| nm          | ev        | Oscillator strengths |                                                                     |            | Initial orb.<br>Cutoff=0.03                                                          | Final orb.<br>Cutoff=0.03                                                             |
| 501.12<br>6 | 2.47<br>4 | 0.032                | H (b) → L+4 (b)<br><br>d (0%) → d <sub>π</sub> (10%)                | 27.0<br>%  | 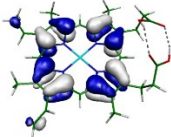   |    |
|             |           |                      | H-1 (b) → L+3 (b)<br><br>d <sub>π</sub> (1%) → d <sub>π</sub> (10%) | 26.9<br>%  |   |   |
| 505.49<br>7 | 2.45<br>3 | 0.021                | H-4 (b) → L+3 (b)<br><br>d <sub>π</sub> (2%) → d <sub>π</sub> (60%) | 22.3<br>%  |  |  |
|             |           |                      | H-5 (b) → L+3 (b)<br><br>d <sub>π</sub> (5%) → d <sub>π</sub> (60%) | 16.0<br>%  |  |  |
| 561.87<br>1 | 2.20<br>7 | 0.011                | H-1 (a) → L+1 (a)<br><br>d (1%) → d (0%)                            | 22.4<br>%  |  |  |

|                           |                         |              |                                                                                        |                         |  |  |
|---------------------------|-------------------------|--------------|----------------------------------------------------------------------------------------|-------------------------|--|--|
|                           |                         |              | <b>H (b) → L+4 (b)</b><br><b>d (0%) → d<sub>π</sub></b><br><b>(10%)</b>                | <b>20.2</b><br><b>%</b> |  |  |
|                           |                         |              | <b>H-6 (b) → L+1 (b)</b><br><b>d<sub>xz</sub> (6%) → d<sub>π</sub></b><br><b>(60%)</b> | <b>15.3</b><br><b>%</b> |  |  |
| <b>568.78</b><br><b>8</b> | <b>2.18</b><br><b>0</b> | <b>0.009</b> | <b>H-1 (a) → L+2 (a)</b><br><b>d (1%) → d<sub>π</sub> (1%)</b>                         | <b>35.7</b><br><b>%</b> |  |  |
| <b>662.96</b><br><b>1</b> | <b>1.87</b><br><b>0</b> | <b>0.007</b> | <b>H (a) → L+1 (a)</b><br><b>d (0%) → d (0%)</b>                                       | <b>34.2</b><br><b>%</b> |  |  |
|                           |                         |              | <b>H (b) → L+3 (b)</b><br><b>d (0%) → d<sub>π</sub></b><br><b>(10%)</b>                | <b>26.3</b><br><b>%</b> |  |  |
| <b>683.29</b><br><b>0</b> | <b>1.81</b><br><b>5</b> | <b>0.011</b> | <b>H-3 (b) → L (b)</b><br><b>d<sub>π</sub> (6%) → d<sub>π</sub></b><br><b>(60%)</b>    | <b>54.0</b><br><b>%</b> |  |  |

**Table S4:** Single point calculation with two different functionals and cc-pVTZ (C, H, O)//aug-ccpVTZ (Fe, N, O (H<sub>2</sub>O)) basis sets, both on the previously OPBE optimized [heme Fe<sup>III</sup>-H<sub>2</sub>O] complex (S=3/2).

| Method | E <sub>b</sub> | D3(BJ) Dispersion | Eb+D3(BJ) |
|--------|----------------|-------------------|-----------|
| OPBE   | -5.73          | -9.21             | -14.94    |
| B3LYP  | -13.00         | -4.94             | -17.94    |

**Table S5** Dipole(H<sub>2</sub>O)–Charge(Fe) interaction energy. Dipoles and charges obtained from OPBE calculations.

| Complex                                                               | μ <sub>2</sub> (H <sub>2</sub> O)<br>(Debye) <sup>a)</sup> | μ <sub>Total</sub> (H <sub>2</sub> O)<br>(Debye) <sup>a)</sup> | q(Fe)<br>(e) <sup>a)</sup> | $E = \frac{1}{4\pi\epsilon_0} \times \frac{\mu_{Total}(H_2O) * q(Fe)}{r_{Fe-OH_2}^2}$<br>(kcal/mol) |
|-----------------------------------------------------------------------|------------------------------------------------------------|----------------------------------------------------------------|----------------------------|-----------------------------------------------------------------------------------------------------|
| [PP-Fe <sup>III</sup> ] <sup>+</sup>                                  | -                                                          | -                                                              | -                          | -                                                                                                   |
| [H PP-Fe] <sup>+</sup>                                                | -                                                          | -                                                              | -                          | -                                                                                                   |
| [PP-Fe <sup>II</sup> ]                                                | -                                                          | -                                                              | -                          | -                                                                                                   |
| [PP-Fe <sup>III</sup> -H <sub>2</sub> O] <sup>+</sup>                 | -0.3854                                                    | 0.5890                                                         | 1.8097                     | 1.411612                                                                                            |
| [H PP -Fe -H <sub>2</sub> O] <sup>+</sup>                             | -0.2908                                                    | 0.5775                                                         | 1.7273                     | 1.255296                                                                                            |
| [PP-Fe <sup>II</sup> -H <sub>2</sub> O]                               | -0.3724                                                    | 0.5891                                                         | 1.6400                     | 1.084075                                                                                            |
| [PP-Fe <sup>III</sup> -(H <sub>2</sub> O) <sub>2</sub> ] <sup>+</sup> | -0.3422                                                    | 0.5965                                                         | 1.8544                     | 1.359292                                                                                            |
| [H PP-Fe-(H <sub>2</sub> O) <sub>2</sub> ] <sup>+</sup>               | -0.3916                                                    | 0.5825                                                         | 1.7799                     | 1.230028                                                                                            |
| [PP-Fe <sup>II</sup> -(H <sub>2</sub> O) <sub>2</sub> ]               | -0.3934                                                    | 0.6282                                                         | 1.6722                     | 1.057596                                                                                            |

**Table S6:** The xyz coordinates of the spin state optimized geometry of the ferric Heme complexes investigated in this study at the OPTX-PBE level of theory.

| <b>[heme-Fe<sup>III</sup>]<sup>+</sup>, S=3/2</b> |           |           |           |
|---------------------------------------------------|-----------|-----------|-----------|
| C                                                 | -3.988082 | 5.065321  | 3.309191  |
| C                                                 | -4.055404 | 6.485040  | 3.553028  |
| C                                                 | -5.401580 | 6.791819  | 3.673325  |
| C                                                 | -6.122350 | 5.559569  | 3.515413  |
| N                                                 | -5.260917 | 4.483034  | 3.305634  |
| C                                                 | -7.508086 | 5.491248  | 3.562880  |
| H                                                 | -8.078914 | 6.417812  | 3.727737  |
| C                                                 | -8.209690 | 4.303091  | 3.426617  |
| C                                                 | -8.741700 | 2.177833  | 3.253312  |
| C                                                 | -9.985733 | 2.892086  | 3.355505  |
| N                                                 | -7.641161 | 3.039007  | 3.288277  |
| C                                                 | -9.649322 | 4.237372  | 3.465118  |
| C                                                 | -8.675155 | 0.795336  | 3.139968  |
| H                                                 | -9.612981 | 0.220633  | 3.129332  |
| C                                                 | -7.475929 | 0.107994  | 3.024818  |
| C                                                 | -5.351831 | -0.396961 | 2.779177  |
| C                                                 | -6.061091 | -1.647399 | 2.760067  |
| N                                                 | -6.211592 | 0.690417  | 2.953652  |
| C                                                 | -7.405980 | -1.328711 | 2.915684  |
| C                                                 | -3.974747 | -0.315342 | 2.629245  |
| H                                                 | -3.412534 | -1.246777 | 2.465530  |
| C                                                 | -3.279872 | 0.885058  | 2.658414  |
| C                                                 | -2.742518 | 3.010958  | 2.843877  |
| C                                                 | -1.514818 | 2.299407  | 2.581742  |
| N                                                 | -3.840749 | 2.145666  | 2.870543  |
| C                                                 | -1.857021 | 0.960890  | 2.478498  |
| C                                                 | -2.803867 | 4.379208  | 3.074748  |
| H                                                 | -1.864957 | 4.955230  | 3.053696  |
| FE                                                | -5.738690 | 2.589836  | 3.107695  |
| C                                                 | -0.125804 | 2.870470  | 2.446616  |
| H                                                 | 0.567743  | 2.213919  | 3.015674  |
| H                                                 | -0.038381 | 3.867199  | 2.921196  |
| C                                                 | 0.400295  | 2.945551  | 0.980180  |
| H                                                 | 1.506924  | 2.989735  | 1.003595  |
| H                                                 | 0.066881  | 2.057393  | 0.404355  |
| C                                                 | -0.066167 | 4.217459  | 0.310560  |
| O                                                 | 0.586357  | 5.262751  | 0.356500  |
| O                                                 | -1.267886 | 4.115314  | -0.284306 |
| H                                                 | -1.531363 | 5.028507  | -0.540402 |
| C                                                 | -2.906110 | 7.451284  | 3.690987  |
| H                                                 | -1.970984 | 6.933155  | 3.983053  |
| H                                                 | -3.143884 | 8.131371  | 4.536830  |
| C                                                 | -2.646955 | 8.335159  | 2.435725  |
| H                                                 | -3.601031 | 8.689381  | 2.000131  |
| H                                                 | -2.026236 | 9.201052  | 2.748960  |
| C                                                 | -1.874490 | 7.573021  | 1.378932  |
| O                                                 | -2.378102 | 7.022898  | 0.399417  |
| O                                                 | -0.560045 | 7.538865  | 1.674517  |
| H                                                 | -0.119021 | 6.943916  | 1.018677  |
| C                                                 | -0.964518 | -0.222575 | 2.228388  |
| H                                                 | -1.031366 | -0.945544 | 3.070054  |
| H                                                 | -1.260513 | -0.747103 | 1.294337  |
| H                                                 | 0.101186  | 0.065708  | 2.124909  |
| C                                                 | -8.568929 | -2.217949 | 2.986170  |



---

|   |            |           |          |
|---|------------|-----------|----------|
| H | -9.329989  | -1.986588 | 3.753223 |
| C | -8.777046  | -3.274170 | 2.172141 |
| H | -8.087297  | -3.539359 | 1.354683 |
| H | -9.674028  | -3.901827 | 2.292230 |
| C | -10.523901 | 5.409184  | 3.567604 |
| H | -10.254869 | 6.288241  | 2.953615 |
| C | -11.611128 | 5.489730  | 4.363030 |
| H | -11.916810 | 4.671902  | 5.035381 |
| H | -12.225654 | 6.403710  | 4.377603 |
| C | -11.346468 | 2.263034  | 3.284884 |
| H | -11.418508 | 1.573739  | 2.417252 |
| H | -11.553958 | 1.682160  | 4.209478 |
| H | -12.140839 | 3.028796  | 3.174203 |
| C | -6.039471  | 8.130104  | 3.916829 |
| H | -5.290082  | 8.938283  | 4.041978 |
| H | -6.689657  | 8.411369  | 3.060077 |
| H | -6.664310  | 8.108076  | 4.835345 |
| C | -5.412647  | -2.997536 | 2.660042 |
| H | -4.590007  | -3.094337 | 3.399803 |
| H | -6.139734  | -3.810794 | 2.858945 |
| H | -4.992174  | -3.154209 | 1.643215 |

---

**[heme-Fe<sup>III</sup>-H<sub>2</sub>O]<sup>+</sup>, S=3/2**

---

|    |            |           |           |
|----|------------|-----------|-----------|
| C  | -6.377266  | 5.488388  | 3.559896  |
| C  | -7.485618  | 6.363550  | 3.862911  |
| C  | -8.620144  | 5.569272  | 3.842844  |
| C  | -8.184590  | 4.234590  | 3.529416  |
| N  | -6.803252  | 4.172261  | 3.376537  |
| C  | -9.063628  | 3.167358  | 3.377320  |
| H  | -10.141552 | 3.349119  | 3.508000  |
| C  | -8.651248  | 1.871488  | 3.093923  |
| C  | -7.423983  | 0.067544  | 2.814229  |
| C  | -8.793700  | -0.372402 | 2.774840  |
| N  | -7.329816  | 1.449711  | 2.983369  |
| C  | -9.570955  | 0.767334  | 2.952378  |
| C  | -6.344211  | -0.805083 | 2.733515  |
| H  | -6.542478  | -1.880906 | 2.613843  |
| C  | -5.023431  | -0.383521 | 2.814875  |
| C  | -3.210149  | 0.855117  | 2.847734  |
| C  | -2.756950  | -0.511398 | 2.797774  |
| N  | -4.600343  | 0.939191  | 2.878659  |
| C  | -3.903873  | -1.295652 | 2.776350  |
| C  | -2.339946  | 1.937975  | 2.825266  |
| H  | -1.261377  | 1.733146  | 2.747473  |
| C  | -2.763529  | 3.259584  | 2.892364  |
| C  | -3.992032  | 5.069745  | 3.147827  |
| C  | -2.626020  | 5.517320  | 3.007302  |
| N  | -4.084090  | 3.682153  | 3.030066  |
| C  | -1.856226  | 4.374216  | 2.865106  |
| C  | -5.061955  | 5.917983  | 3.416223  |
| H  | -4.855141  | 6.995312  | 3.519010  |
| FE | -5.708168  | 2.567083  | 2.984638  |
| C  | -2.114679  | 6.936184  | 3.005847  |
| H  | -1.178833  | 6.965965  | 3.604561  |
| H  | -2.811132  | 7.627971  | 3.518500  |
| C  | -1.778734  | 7.489082  | 1.586268  |
| H  | -1.063639  | 8.328364  | 1.692585  |
| H  | -1.334876  | 6.688403  | 0.959018  |
| C  | -3.012281  | 8.060985  | 0.928072  |
| O  | -3.347374  | 9.239132  | 1.064036  |
| O  | -3.736243  | 7.164400  | 0.228115  |
| H  | -4.574319  | 7.622638  | -0.010846 |

---

|                                                                                |            |           |          |
|--------------------------------------------------------------------------------|------------|-----------|----------|
| C                                                                              | -7.434225  | 7.841027  | 4.164149 |
| H                                                                              | -6.432696  | 8.144500  | 4.529430 |
| H                                                                              | -8.128609  | 8.035033  | 5.009322 |
| C                                                                              | -7.864850  | 8.758502  | 2.982474 |
| H                                                                              | -8.766007  | 8.353728  | 2.482336 |
| H                                                                              | -8.076938  | 9.768970  | 3.390654 |
| C                                                                              | -6.752995  | 8.895507  | 1.963495 |
| O                                                                              | -6.643279  | 8.213899  | 0.942464 |
| O                                                                              | -5.866957  | 9.836951  | 2.341677 |
| H                                                                              | -5.107655  | 9.809788  | 1.708985 |
| C                                                                              | -0.365616  | 4.255391  | 2.705315 |
| H                                                                              | 0.067953   | 3.675613  | 3.548599 |
| H                                                                              | -0.110958  | 3.734801  | 1.757006 |
| H                                                                              | 0.138092   | 5.243299  | 2.689165 |
| C                                                                              | -4.032134  | -2.756972 | 2.737597 |
| H                                                                              | -4.792477  | -3.205952 | 3.401955 |
| C                                                                              | -3.307805  | -3.574738 | 1.946008 |
| H                                                                              | -2.563093  | -3.197415 | 1.226418 |
| H                                                                              | -3.457859  | -4.665082 | 1.984608 |
| C                                                                              | -11.030856 | 0.902525  | 2.987630 |
| H                                                                              | -11.464543 | 1.766412  | 2.450973 |
| C                                                                              | -11.867642 | 0.067139  | 3.637815 |
| H                                                                              | -11.509697 | -0.789832 | 4.230665 |
| H                                                                              | -12.955896 | 0.234176  | 3.609819 |
| C                                                                              | -9.235033  | -1.787173 | 2.531316 |
| H                                                                              | -8.693287  | -2.227359 | 1.667941 |
| H                                                                              | -9.033484  | -2.414014 | 3.426611 |
| H                                                                              | -10.321065 | -1.839000 | 2.312639 |
| C                                                                              | -10.050751 | 5.968246  | 4.078706 |
| H                                                                              | -10.150874 | 7.038764  | 4.350874 |
| H                                                                              | -10.658842 | 5.801046  | 3.162942 |
| H                                                                              | -10.492386 | 5.369588  | 4.903681 |
| C                                                                              | -1.317564  | -0.940101 | 2.824498 |
| H                                                                              | -0.772508  | -0.429418 | 3.646033 |
| H                                                                              | -1.226973  | -2.033361 | 2.987704 |
| H                                                                              | -0.818165  | -0.694453 | 1.862470 |
| O                                                                              | -5.870773  | 2.945908  | 0.741267 |
| H                                                                              | -6.805866  | 2.963484  | 0.475141 |
| H                                                                              | -5.544445  | 3.845612  | 0.563706 |
| <b>[heme-Fe<sup>III</sup>-(H<sub>2</sub>O)<sub>2</sub>]<sup>+</sup>, S=3/2</b> |            |           |          |
| C                                                                              | -6.900443  | 5.393011  | 3.361711 |
| C                                                                              | -8.158656  | 6.093120  | 3.498587 |
| C                                                                              | -9.146805  | 5.123458  | 3.456705 |
| C                                                                              | -8.479207  | 3.858172  | 3.294400 |
| N                                                                              | -7.101278  | 4.020237  | 3.247665 |
| C                                                                              | -9.161136  | 2.648207  | 3.187053 |
| H                                                                              | -10.260618 | 2.660647  | 3.231334 |
| C                                                                              | -8.527342  | 1.421124  | 3.017741 |
| C                                                                              | -7.004104  | -0.156700 | 2.848118 |
| C                                                                              | -8.280094  | -0.820454 | 2.742854 |
| N                                                                              | -7.155677  | 1.215921  | 3.015690 |
| C                                                                              | -9.243349  | 0.175320  | 2.856813 |
| C                                                                              | -5.787869  | -0.833960 | 2.796721 |
| H                                                                              | -5.805671  | -1.926202 | 2.666609 |
| C                                                                              | -4.549792  | -0.206625 | 2.899768 |
| C                                                                              | -2.961310  | 1.308642  | 3.035513 |
| C                                                                              | -2.290883  | 0.034206  | 2.965344 |
| N                                                                              | -4.344126  | 1.161555  | 3.006009 |
| C                                                                              | -3.294080  | -0.924181 | 2.874168 |
| C                                                                              | -2.281643  | 2.521567  | 3.108913 |
| H                                                                              | -1.181805  | 2.497378  | 3.111503 |

---

|    |            |           |           |
|----|------------|-----------|-----------|
| C  | -2.915667  | 3.759955  | 3.161380  |
| C  | -4.437577  | 5.350929  | 3.242998  |
| C  | -3.150750  | 6.012312  | 3.234985  |
| N  | -4.288980  | 3.969380  | 3.177965  |
| C  | -2.198146  | 5.007465  | 3.201572  |
| C  | -5.656737  | 6.020764  | 3.333779  |
| H  | -5.634675  | 7.119998  | 3.399882  |
| FE | -5.723866  | 2.592274  | 3.117806  |
| C  | -2.873315  | 7.494592  | 3.247976  |
| H  | -2.032420  | 7.679465  | 3.950232  |
| H  | -3.727050  | 8.073439  | 3.652173  |
| C  | -2.455504  | 8.080346  | 1.863382  |
| H  | -1.913262  | 9.032157  | 2.030018  |
| H  | -1.803791  | 7.361310  | 1.325205  |
| C  | -3.671385  | 8.420620  | 1.034401  |
| O  | -4.216434  | 9.525203  | 1.084858  |
| O  | -4.131623  | 7.402053  | 0.281759  |
| H  | -5.001040  | 7.697418  | -0.073834 |
| C  | -8.374707  | 7.575622  | 3.670714  |
| H  | -7.486898  | 8.069350  | 4.114657  |
| H  | -9.190929  | 7.710214  | 4.411384  |
| C  | -8.797563  | 8.320599  | 2.369218  |
| H  | -9.522533  | 7.715070  | 1.792159  |
| H  | -9.255997  | 9.289190  | 2.660615  |
| C  | -7.596851  | 8.624282  | 1.498818  |
| O  | -7.227547  | 7.938738  | 0.543066  |
| O  | -6.952038  | 9.723218  | 1.934543  |
| H  | -6.114247  | 9.808812  | 1.416031  |
| C  | -0.699022  | 5.126786  | 3.197063  |
| H  | -0.264773  | 4.603546  | 4.076305  |
| H  | -0.270968  | 4.674178  | 2.276517  |
| H  | -0.359327  | 6.181819  | 3.238398  |
| C  | -3.180281  | -2.383930 | 2.784101  |
| H  | -3.893814  | -2.977880 | 3.384103  |
| C  | -2.290068  | -3.041073 | 2.011749  |
| H  | -1.579036  | -2.520954 | 1.349952  |
| H  | -2.261555  | -4.141992 | 2.006529  |
| C  | -10.705408 | 0.069050  | 2.800829  |
| H  | -11.237378 | 0.845011  | 2.219671  |
| C  | -8.465113  | -2.289678 | 2.494373  |
| H  | -7.820131  | -2.631599 | 1.657597  |
| H  | -8.199902  | -2.875271 | 3.401193  |
| H  | -9.516155  | -2.525143 | 2.229725  |
| C  | -10.637389 | 5.295482  | 3.542197  |
| H  | -10.931566 | 6.353716  | 3.700235  |
| H  | -11.123815 | 4.954057  | 2.602607  |
| H  | -11.055042 | 4.702861  | 4.384439  |
| C  | -0.802886  | -0.153488 | 3.046842  |
| H  | -0.382668  | 0.400416  | 3.913108  |
| H  | -0.536336  | -1.223069 | 3.170340  |
| H  | -0.311402  | 0.217331  | 2.121683  |
| O  | -5.756287  | 2.792275  | 0.759120  |
| H  | -6.501537  | 3.371321  | 0.525481  |
| O  | -5.701127  | 2.396552  | 5.477507  |
| H  | -4.937645  | 1.845034  | 5.715699  |
| H  | -4.976454  | 3.315112  | 0.507080  |
| H  | -6.464092  | 1.850131  | 5.730045  |
| C  | -11.434785 | -0.887185 | 3.412703  |
| H  | -12.531460 | -0.904881 | 3.311389  |
| H  | -10.980926 | -1.668401 | 4.043543  |

---

[MI-heme-Fe<sup>III</sup>]<sup>+</sup>, S=5/2

---

|   |           |           |          |
|---|-----------|-----------|----------|
| C | -7.256709 | -2.381651 | 7.526109 |
|---|-----------|-----------|----------|

---

---

|    |            |           |           |
|----|------------|-----------|-----------|
| C  | -7.937048  | -1.696731 | 8.609079  |
| C  | -8.886829  | -0.876426 | 8.013417  |
| C  | -8.786094  | -1.086221 | 6.589571  |
| N  | -7.828644  | -2.045883 | 6.304548  |
| C  | -9.541791  | -0.389420 | 5.638951  |
| H  | -10.276819 | 0.341871  | 6.012581  |
| C  | -9.420757  | -0.509195 | 4.251564  |
| C  | -8.825168  | -1.208749 | 2.246643  |
| C  | -9.786316  | -0.148342 | 2.031844  |
| N  | -8.626807  | -1.432025 | 3.600641  |
| C  | -10.178694 | 0.282489  | 3.296041  |
| C  | -8.211389  | -1.926704 | 1.213640  |
| H  | -8.494849  | -1.668174 | 0.181421  |
| C  | -7.238894  | -2.917792 | 1.382166  |
| C  | -5.705843  | -4.214844 | 2.297902  |
| C  | -5.578547  | -4.393545 | 0.870562  |
| N  | -6.748135  | -3.352444 | 2.601626  |
| C  | -6.548232  | -3.576256 | 0.290494  |
| C  | -4.850926  | -4.797517 | 3.239815  |
| H  | -4.065061  | -5.466594 | 2.855104  |
| C  | -4.875798  | -4.568297 | 4.619723  |
| C  | -5.446076  | -3.853239 | 6.630815  |
| C  | -4.257130  | -4.671765 | 6.803303  |
| N  | -5.810422  | -3.801738 | 5.293955  |
| C  | -3.911960  | -5.126521 | 5.540304  |
| C  | -6.148241  | -3.227554 | 7.670538  |
| H  | -5.776839  | -3.394144 | 8.696603  |
| FE | -7.525552  | -2.965629 | 4.473508  |
| C  | -3.511594  | -4.979567 | 8.079743  |
| H  | -3.275598  | -6.065292 | 8.085596  |
| H  | -4.142691  | -4.812422 | 8.974840  |
| C  | -2.167388  | -4.202364 | 8.241250  |
| H  | -1.507661  | -4.770636 | 8.925653  |
| H  | -1.677952  | -4.074718 | 7.253893  |
| C  | -2.409396  | -2.861852 | 8.891922  |
| O  | -2.424178  | -2.719912 | 10.118606 |
| O  | -2.659721  | -1.867338 | 8.025270  |
| H  | -2.956730  | -1.092676 | 8.556861  |
| C  | -7.693866  | -1.835694 | 10.094449 |
| H  | -7.220073  | -2.808092 | 10.337278 |
| H  | -8.686963  | -1.851265 | 10.592568 |
| C  | -6.866029  | -0.679533 | 10.722074 |
| H  | -7.182364  | 0.300294  | 10.315690 |
| H  | -7.025219  | -0.699287 | 11.821527 |
| C  | -5.380742  | -0.850475 | 10.483157 |
| O  | -4.711050  | -0.160828 | 9.714030  |
| O  | -4.887163  | -1.873894 | 11.206996 |
| H  | -3.933593  | -1.988449 | 10.961509 |
| C  | -2.767126  | -6.019788 | 5.144508  |
| H  | -3.144967  | -6.942213 | 4.652736  |
| H  | -2.094812  | -5.494412 | 4.433307  |
| H  | -2.155176  | -6.335576 | 6.013929  |
| C  | -6.851591  | -3.359488 | -1.126876 |
| H  | -7.919594  | -3.263021 | -1.394823 |
| C  | -5.935280  | -3.241533 | -2.110980 |
| H  | -4.850411  | -3.272640 | -1.922273 |
| H  | -6.256182  | -3.080330 | -3.151983 |
| C  | -10.195051 | 0.391413  | 0.690414  |
| H  | -9.314230  | 0.489500  | 0.023271  |
| H  | -10.930461 | -0.285723 | 0.204562  |
| H  | -10.662244 | 1.393526  | 0.786063  |
| C  | -9.840685  | 0.082023  | 8.673812  |

---

|                                                                     |            |           |           |
|---------------------------------------------------------------------|------------|-----------|-----------|
| H                                                                   | -9.775824  | 0.048659  | 9.780794  |
| H                                                                   | -9.615126  | 1.122517  | 8.356824  |
| H                                                                   | -10.890538 | -0.145951 | 8.389934  |
| C                                                                   | -4.610460  | -5.327317 | 0.202239  |
| H                                                                   | -4.610285  | -6.320059 | 0.700456  |
| H                                                                   | -4.871333  | -5.484005 | -0.864587 |
| H                                                                   | -3.580431  | -4.913051 | 0.248085  |
| N                                                                   | -8.964487  | -4.501881 | 4.676566  |
| C                                                                   | -9.740928  | -4.712914 | 5.739979  |
| C                                                                   | -9.284767  | -5.484435 | 3.748959  |
| H                                                                   | -9.736029  | -4.113033 | 6.650914  |
| C                                                                   | -10.269298 | -6.300987 | 4.257968  |
| H                                                                   | -8.785838  | -5.533621 | 2.777562  |
| H                                                                   | -11.222541 | -6.159699 | 6.171503  |
| C                                                                   | -10.971021 | -7.490111 | 3.688044  |
| H                                                                   | -10.813399 | -8.393501 | 4.317873  |
| H                                                                   | -12.066102 | -7.312581 | 3.605118  |
| H                                                                   | -10.584790 | -7.711609 | 2.673251  |
| N                                                                   | -10.536959 | -5.787134 | 5.521402  |
| C                                                                   | -11.110901 | 1.351274  | 3.663048  |
| H                                                                   | -10.831779 | 1.960721  | 4.541175  |
| C                                                                   | -12.277341 | 1.632038  | 3.043311  |
| H                                                                   | -12.653425 | 1.046153  | 2.189571  |
| H                                                                   | -12.909098 | 2.461698  | 3.396721  |
| <b>[MI-heme-Fe<sup>III</sup>-H<sub>2</sub>O]<sup>+</sup>, S=5/2</b> |            |           |           |
| C                                                                   | -7.228887  | -2.339317 | 7.564396  |
| C                                                                   | -7.931496  | -1.660464 | 8.640869  |
| C                                                                   | -8.932121  | -0.907076 | 8.040440  |
| C                                                                   | -8.827783  | -1.130837 | 6.615861  |
| N                                                                   | -7.799599  | -2.012240 | 6.347332  |
| C                                                                   | -9.646830  | -0.507014 | 5.658308  |
| H                                                                   | -10.424013 | 0.175557  | 6.035909  |
| C                                                                   | -9.543532  | -0.638357 | 4.264349  |
| C                                                                   | -8.876647  | -1.272861 | 2.252821  |
| C                                                                   | -9.887757  | -0.260708 | 2.040060  |
| N                                                                   | -8.689477  | -1.495204 | 3.605150  |
| C                                                                   | -10.325437 | 0.126579  | 3.307337  |
| C                                                                   | -8.177748  | -1.925750 | 1.222170  |
| H                                                                   | -8.435631  | -1.651457 | 0.188234  |
| C                                                                   | -7.180445  | -2.898450 | 1.397573  |
| C                                                                   | -5.693497  | -4.239077 | 2.338161  |
| C                                                                   | -5.552947  | -4.422464 | 0.909556  |
| N                                                                   | -6.694000  | -3.327088 | 2.614446  |
| C                                                                   | -6.476776  | -3.563467 | 0.313569  |
| C                                                                   | -4.883544  | -4.870374 | 3.297259  |
| H                                                                   | -4.121224  | -5.567800 | 2.917224  |
| C                                                                   | -4.914552  | -4.657813 | 4.685873  |
| C                                                                   | -5.446616  | -3.882644 | 6.693915  |
| C                                                                   | -4.297660  | -4.756186 | 6.873668  |
| N                                                                   | -5.798072  | -3.834580 | 5.357841  |
| C                                                                   | -3.981000  | -5.253007 | 5.616302  |
| C                                                                   | -6.125119  | -3.199358 | 7.721888  |
| H                                                                   | -5.754959  | -3.349431 | 8.749920  |
| FE                                                                  | -7.327268  | -2.755180 | 4.481084  |
| C                                                                   | -3.543465  | -5.051095 | 8.145802  |
| H                                                                   | -3.303916  | -6.135861 | 8.163940  |
| H                                                                   | -4.159372  | -4.866612 | 9.048736  |
| C                                                                   | -2.194239  | -4.275183 | 8.274460  |
| H                                                                   | -1.540082  | -4.814904 | 8.987284  |
| H                                                                   | -1.702455  | -4.199678 | 7.283417  |
| C                                                                   | -2.427184  | -2.905349 | 8.864571  |
| O                                                                   | -2.469857  | -2.713876 | 10.082829 |

---

|   |            |           |           |
|---|------------|-----------|-----------|
| O | -2.632571  | -1.934857 | 7.955187  |
| H | -2.931783  | -1.143242 | 8.459772  |
| C | -7.652536  | -1.732615 | 10.120211 |
| H | -7.162330  | -2.687762 | 10.401543 |
| H | -8.628177  | -1.728610 | 10.650661 |
| C | -6.817219  | -0.538239 | 10.670295 |
| H | -7.150260  | 0.413668  | 10.214576 |
| H | -6.952484  | -0.501811 | 11.772361 |
| C | -5.339705  | -0.728732 | 10.404381 |
| O | -4.703753  | -0.156368 | 9.516656  |
| O | -4.812259  | -1.638071 | 11.245458 |
| H | -3.877309  | -1.806810 | 10.965247 |
| C | -2.881743  | -6.204171 | 5.231372  |
| H | -3.302166  | -7.097098 | 4.720393  |
| H | -2.167698  | -5.714297 | 4.533903  |
| H | -2.300176  | -6.563687 | 6.105476  |
| C | -6.756144  | -3.342128 | -1.106324 |
| H | -7.815575  | -3.187052 | -1.382679 |
| C | -5.827400  | -3.279171 | -2.084965 |
| H | -4.747282  | -3.367273 | -1.888860 |
| H | -6.130508  | -3.107485 | -3.129509 |
| C | -10.301263 | 0.271434  | 0.697970  |
| H | -9.410447  | 0.495775  | 0.074271  |
| H | -10.922953 | -0.476664 | 0.159271  |
| H | -10.892436 | 1.204951  | 0.794076  |
| C | -9.937355  | 0.001421  | 8.691174  |
| H | -9.872874  | -0.014778 | 9.799029  |
| H | -9.775734  | 1.051874  | 8.364380  |
| H | -10.971794 | -0.291319 | 8.409674  |
| C | -4.610721  | -5.392272 | 0.256094  |
| H | -4.657070  | -6.382525 | 0.756159  |
| H | -4.857683  | -5.540770 | -0.815319 |
| H | -3.566275  | -5.016742 | 0.320460  |
| O | -5.727172  | -0.921624 | 4.340315  |
| H | -5.915179  | -0.339757 | 5.095320  |
| H | -4.859092  | -1.298691 | 4.559424  |
| N | -8.736533  | -4.395847 | 4.643562  |
| C | -8.943061  | -5.176454 | 5.695186  |
| C | -9.595161  | -4.824470 | 3.647199  |
| H | -8.419769  | -5.094418 | 6.647285  |
| C | -10.339258 | -5.889934 | 4.104493  |
| H | -9.614725  | -4.336877 | 2.668513  |
| H | -10.251614 | -6.805237 | 6.041547  |
| C | -11.401912 | -6.723918 | 3.460341  |
| H | -11.112764 | -7.797277 | 3.437583  |
| H | -12.367817 | -6.634899 | 4.003983  |
| H | -11.558918 | -6.385176 | 2.417354  |
| N | -9.903473  | -6.093144 | 5.407537  |
| C | -11.320725 | 1.136438  | 3.673564  |
| H | -11.085070 | 1.764839  | 4.552683  |
| C | -12.498718 | 1.338035  | 3.044457  |
| H | -12.831128 | 0.721819  | 2.194214  |
| H | -13.185911 | 2.127881  | 3.386166  |

---

[hemeH-Fe<sup>II</sup>]<sup>+</sup>, S=1

---

|   |           |          |          |
|---|-----------|----------|----------|
| C | -3.270666 | 4.386210 | 3.245738 |
| C | -2.865134 | 5.772447 | 3.397669 |
| C | -4.029730 | 6.508112 | 3.464684 |
| C | -5.114843 | 5.563475 | 3.365699 |
| N | -4.653675 | 4.256714 | 3.243312 |
| C | -6.446747 | 5.950660 | 3.385802 |
| H | -6.658795 | 7.026556 | 3.462920 |

---

---

|    |            |           |           |
|----|------------|-----------|-----------|
| C  | -7.501535  | 5.052087  | 3.309748  |
| C  | -8.719236  | 3.207264  | 3.205524  |
| C  | -9.667965  | 4.239451  | 3.243632  |
| N  | -7.383956  | 3.688934  | 3.235035  |
| C  | -8.919516  | 5.465761  | 3.313606  |
| C  | -9.074981  | 1.848199  | 3.164865  |
| H  | -10.145007 | 1.598703  | 3.144163  |
| C  | -8.172622  | 0.812862  | 3.124502  |
| C  | -6.327056  | -0.359249 | 2.989030  |
| C  | -7.409747  | -1.320964 | 3.008917  |
| N  | -6.779179  | 0.945760  | 3.073682  |
| C  | -8.573961  | -0.582917 | 3.091686  |
| C  | -4.990531  | -0.741478 | 2.884298  |
| H  | -4.759468  | -1.813554 | 2.795685  |
| C  | -3.944134  | 0.164431  | 2.866554  |
| C  | -2.760948  | 2.006525  | 2.939582  |
| C  | -1.816747  | 0.911428  | 2.760196  |
| N  | -4.068321  | 1.550758  | 2.982838  |
| C  | -2.565362  | -0.242535 | 2.730113  |
| C  | -2.375603  | 3.334796  | 3.083211  |
| H  | -1.300120  | 3.571185  | 3.053711  |
| FE | -5.728712  | 2.605782  | 3.140054  |
| C  | -0.317110  | 1.001788  | 2.626278  |
| H  | 0.129412   | 0.197526  | 3.250121  |
| H  | 0.081978   | 1.947925  | 3.042179  |
| C  | 0.212029   | 0.809142  | 1.171776  |
| H  | 1.276879   | 0.507160  | 1.218624  |
| H  | -0.382150  | 0.031029  | 0.649117  |
| C  | 0.169039   | 2.111079  | 0.406674  |
| O  | 1.125752   | 2.889125  | 0.375443  |
| O  | -1.012601  | 2.362838  | -0.184250 |
| H  | -0.970877  | 3.291804  | -0.506941 |
| C  | -1.460993  | 6.312507  | 3.498056  |
| H  | -0.748618  | 5.535605  | 3.841083  |
| H  | -1.457402  | 7.087872  | 4.293833  |
| C  | -0.925245  | 6.975766  | 2.195129  |
| H  | -1.709547  | 7.596343  | 1.720643  |
| H  | -0.051058  | 7.605101  | 2.465497  |
| C  | -0.452218  | 5.933963  | 1.202876  |
| O  | -1.114376  | 5.513981  | 0.253500  |
| O  | 0.781233   | 5.492681  | 1.519771  |
| H  | 0.997820   | 4.741475  | 0.913250  |
| C  | -2.108657  | -1.667795 | 2.580657  |
| H  | -2.418990  | -2.272928 | 3.459996  |
| H  | -2.544869  | -2.128443 | 1.667920  |
| H  | -1.005613  | -1.749961 | 2.498162  |
| C  | -9.965577  | -1.042461 | 3.161782  |
| H  | -10.622965 | -0.533676 | 3.889627  |
| C  | -10.490328 | -2.021121 | 2.395818  |
| H  | -9.908719  | -2.542153 | 1.618370  |
| H  | -11.544109 | -2.317708 | 2.516356  |
| C  | -9.348513  | 6.775265  | 3.371016  |
| H  | -8.562419  | 7.547758  | 3.416091  |
| C  | -10.748901 | 7.296999  | 3.378807  |
| H  | -11.325579 | 6.902179  | 4.242420  |
| H  | -10.753385 | 8.405152  | 3.437909  |
| C  | -11.158019 | 4.095536  | 3.219874  |
| H  | -11.495251 | 3.044740  | 3.151639  |
| H  | -11.606826 | 4.532892  | 4.137283  |
| H  | -11.589259 | 4.639170  | 2.352390  |
| C  | -4.198299  | 7.995312  | 3.610696  |
| H  | -3.225556  | 8.521852  | 3.693327  |

---

---

|   |            |           |          |
|---|------------|-----------|----------|
| H | -4.726043  | 8.418492  | 2.728158 |
| H | -4.785777  | 8.239897  | 4.522046 |
| C | -7.222312  | -2.810591 | 3.004807 |
| H | -6.491999  | -3.115872 | 3.784082 |
| H | -8.175915  | -3.336542 | 3.212492 |
| H | -6.848020  | -3.154961 | 2.016654 |
| H | -11.297656 | 6.997715  | 2.460317 |

---

**[hemeH-Fe<sup>II</sup>-H<sub>2</sub>O]<sup>+</sup>, S=1**

---

|    |            |           |           |
|----|------------|-----------|-----------|
| C  | -2.964365  | 3.903238  | 3.197821  |
| C  | -2.300056  | 5.182926  | 3.359864  |
| C  | -3.302340  | 6.120676  | 3.511169  |
| C  | -4.549616  | 5.401483  | 3.427979  |
| N  | -4.345222  | 4.040119  | 3.240694  |
| C  | -5.787658  | 6.028203  | 3.504289  |
| H  | -5.796261  | 7.118834  | 3.640977  |
| C  | -6.994573  | 5.350225  | 3.390721  |
| C  | -8.533120  | 3.775423  | 3.155801  |
| C  | -9.270607  | 4.967583  | 3.237339  |
| N  | -7.135599  | 3.995958  | 3.232860  |
| C  | -8.309108  | 6.022657  | 3.409688  |
| C  | -9.139841  | 2.509795  | 3.071891  |
| H  | -10.236974 | 2.471763  | 3.018270  |
| C  | -8.454875  | 1.316130  | 3.079231  |
| C  | -6.867124  | -0.193646 | 3.060365  |
| C  | -8.115621  | -0.928150 | 3.087066  |
| N  | -7.065299  | 1.174758  | 3.070050  |
| C  | -9.117494  | 0.023495  | 3.088610  |
| C  | -5.625579  | -0.825908 | 3.003496  |
| H  | -5.602031  | -1.925703 | 2.980204  |
| C  | -4.424607  | -0.135425 | 2.941711  |
| C  | -2.917746  | 1.458938  | 2.916057  |
| C  | -2.196987  | 0.201951  | 2.779136  |
| N  | -4.286579  | 1.252403  | 2.984290  |
| C  | -3.146360  | -0.795587 | 2.818188  |
| C  | -2.291683  | 2.698031  | 3.015367  |
| H  | -1.192098  | 2.726721  | 2.958966  |
| FE | -5.721969  | 2.618461  | 3.090181  |
| C  | -0.711224  | 0.009350  | 2.601689  |
| H  | -0.396957  | -0.850032 | 3.232095  |
| H  | -0.131460  | 0.875360  | 2.977816  |
| C  | -0.281418  | -0.310090 | 1.136616  |
| H  | 0.717901   | -0.788229 | 1.155224  |
| H  | -1.019829  | -0.991326 | 0.664796  |
| C  | -0.134055  | 0.955366  | 0.325430  |
| O  | 0.936826   | 1.557361  | 0.225282  |
| O  | -1.280044  | 1.393081  | -0.234586 |
| H  | -1.081099  | 2.288858  | -0.591272 |
| C  | -0.816406  | 5.451615  | 3.373276  |
| H  | -0.242078  | 4.557742  | 3.690805  |
| H  | -0.618262  | 6.220379  | 4.149589  |
| C  | -0.250310  | 5.990686  | 2.025844  |
| H  | -0.940450  | 6.737819  | 1.588200  |
| H  | 0.738372   | 6.453783  | 2.228002  |
| C  | -0.037262  | 4.867615  | 1.032659  |
| O  | -0.843345  | 4.529287  | 0.163761  |
| O  | 1.139676   | 4.249689  | 1.251793  |
| H  | 1.178365   | 3.454846  | 0.665221  |
| C  | -2.961945  | -2.286737 | 2.740987  |
| H  | -3.361228  | -2.776457 | 3.655444  |
| H  | -3.494813  | -2.707096 | 1.860521  |
| H  | -1.894771  | -2.575574 | 2.651465  |

---



---

|   |            |           |          |
|---|------------|-----------|----------|
| C | -10.574194 | -0.156988 | 3.117869 |
| H | -11.143913 | 0.495461  | 3.803910 |
| C | -11.253414 | -1.046036 | 2.364640 |
| H | -10.757856 | -1.699150 | 1.628116 |
| H | -12.347776 | -1.132215 | 2.454364 |
| C | -8.490495  | 7.381138  | 3.578238 |
| H | -7.576251  | 7.985642  | 3.701934 |
| C | -9.770964  | 8.151459  | 3.623598 |
| H | -10.431289 | 7.798255  | 4.444441 |
| H | -9.570802  | 9.231293  | 3.783168 |
| C | -10.759703 | 5.111720  | 3.165101 |
| H | -11.281348 | 4.154668  | 2.979377 |
| H | -11.157539 | 5.534482  | 4.112536 |
| H | -11.046282 | 5.808171  | 2.349014 |
| C | -3.182124  | 7.607142  | 3.709585 |
| H | -2.125257  | 7.940188  | 3.755157 |
| H | -3.663711  | 8.156318  | 2.871137 |
| H | -3.669947  | 7.918372  | 4.658722 |
| C | -8.225025  | -2.424797 | 3.156359 |
| H | -7.584414  | -2.826376 | 3.969855 |
| H | -9.268264  | -2.741073 | 3.358952 |
| H | -7.906114  | -2.886005 | 2.196767 |
| O | -5.681564  | 2.812876  | 0.758829 |
| H | -5.143571  | 3.592398  | 0.538041 |
| H | -5.152347  | 2.065209  | 0.432074 |
| H | -10.344548 | 8.043192  | 2.678393 |

---
